# Supplementary material
Source: Elsevier journal article supplement (https://comptes-rendus.academie-sciences.fr/biologies/article/10.1016/j.crvi.2019.10.003/file/attach/mmc2.pdf)
Supplement: mmc2 [file mmc2.pdf]

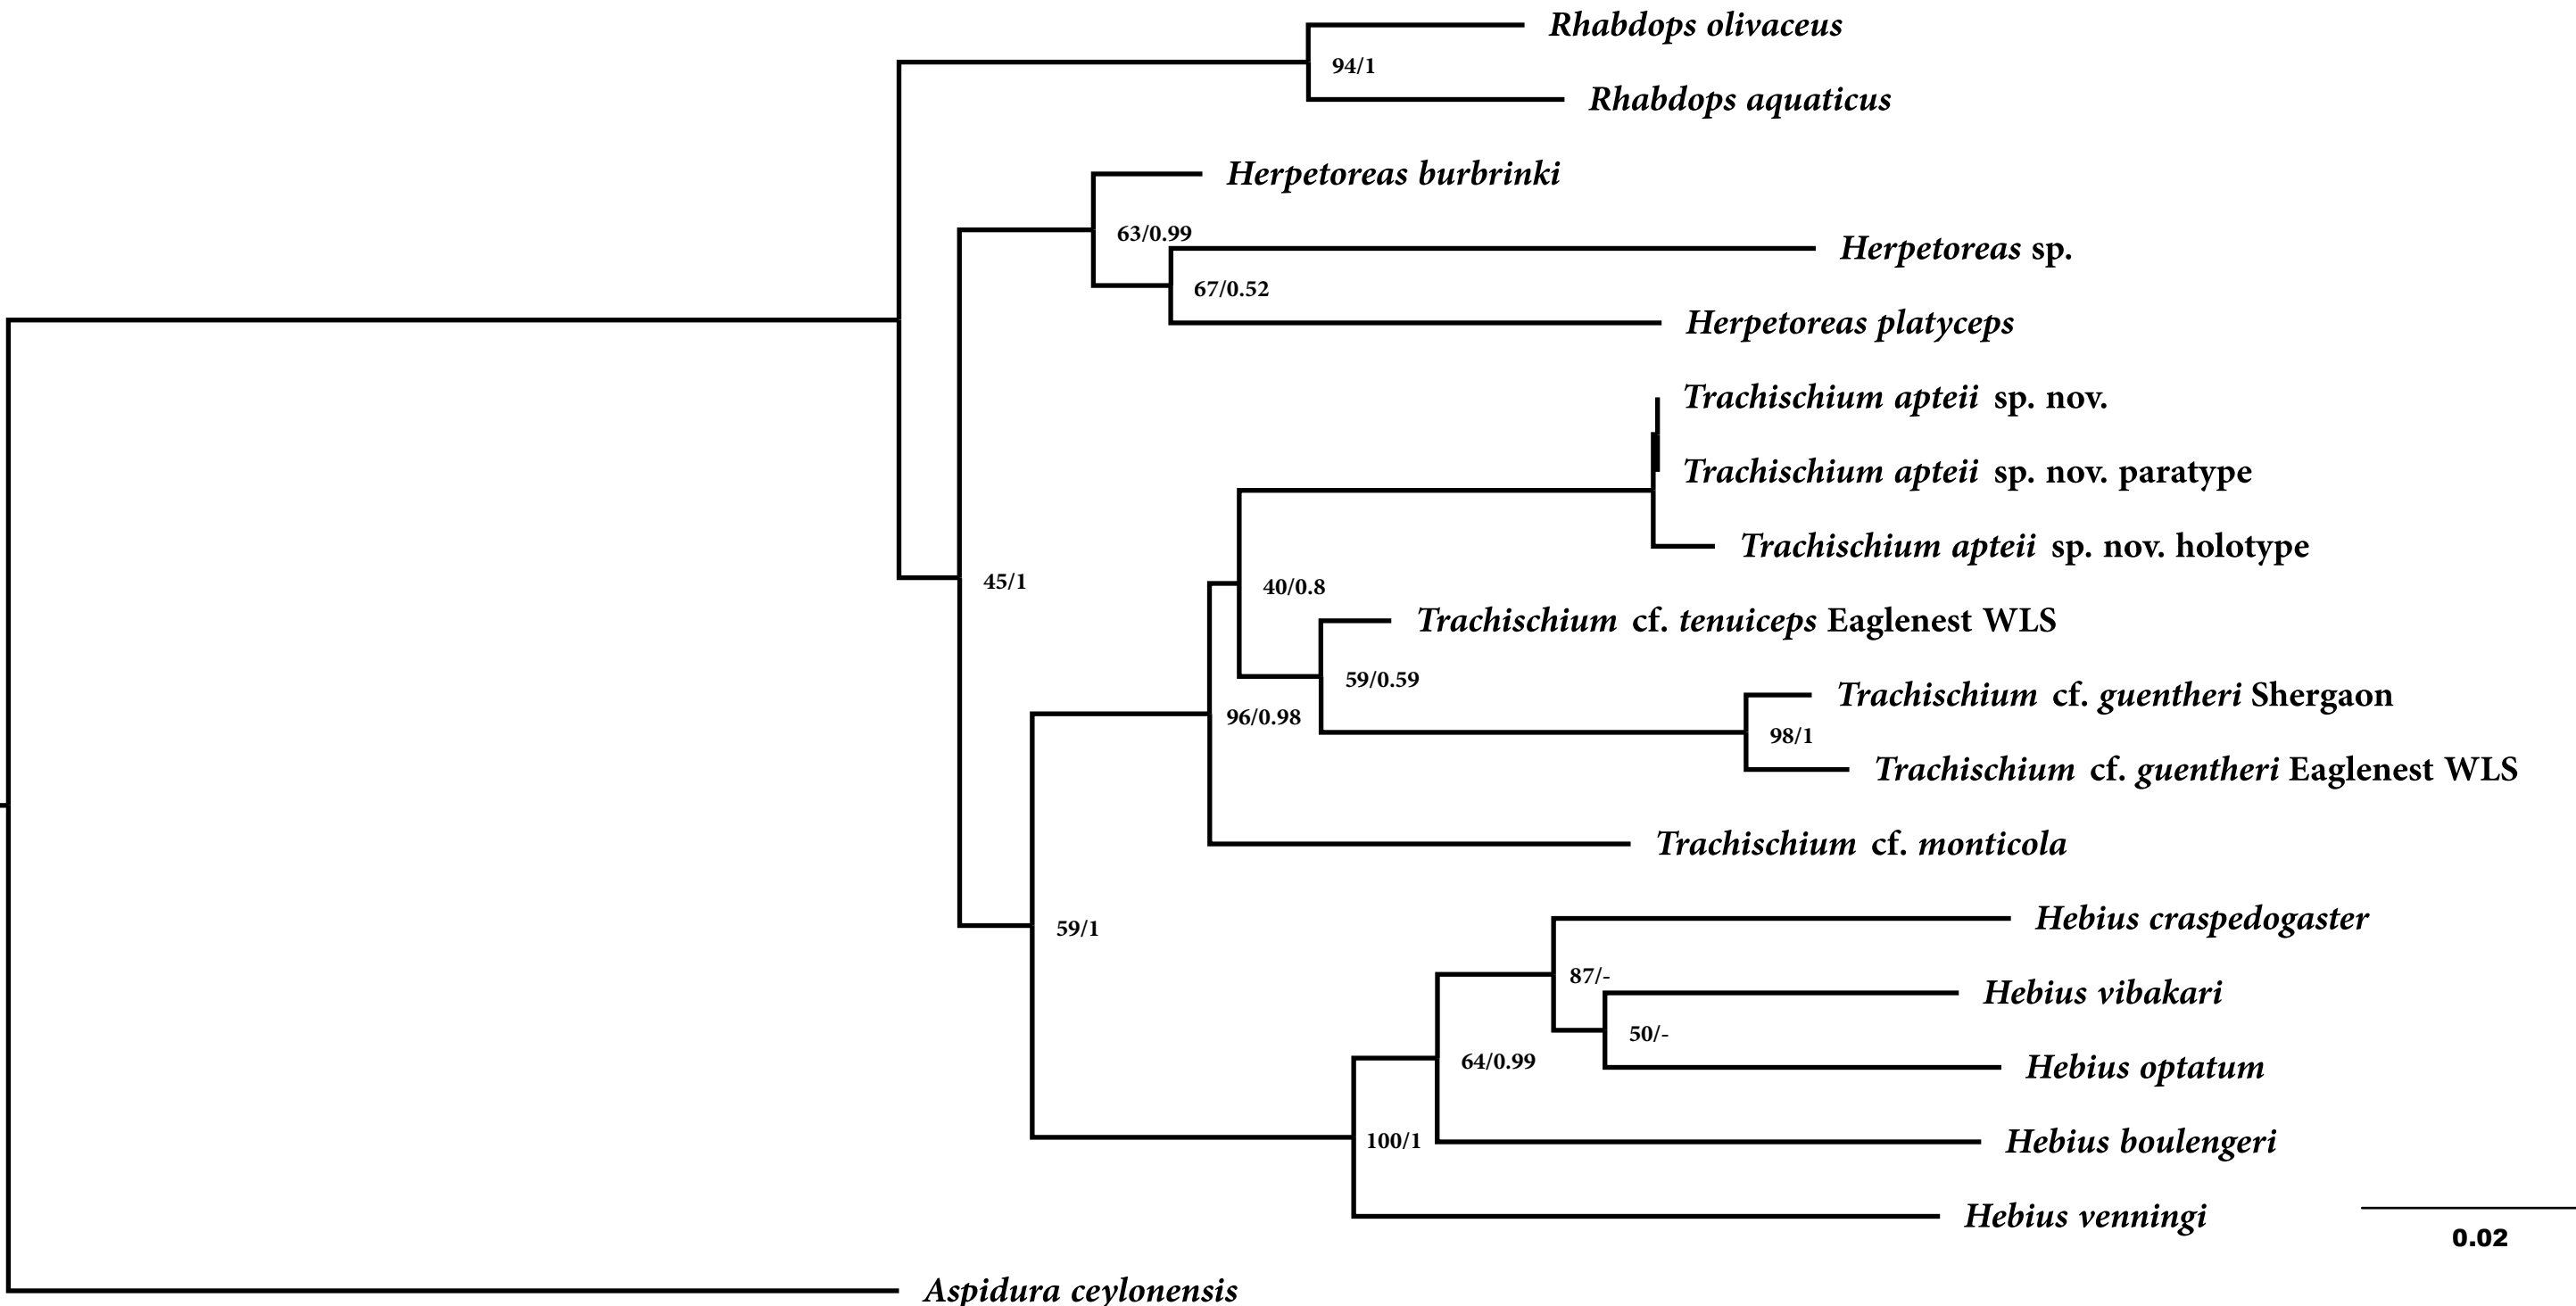

0.02
